# Supplementary material for: Leveraging the A-site Ba2+–Sr2+ ratio in the designated perovskite to enhance oxygen transport and structural/interfacial stability
Source: Royal Society of Chemistry journal article supplement (doi:10.1039/c3ra45988h), 2013-12-17

**Figure S1:** Schematic of oxygen permeation examination of the tubular membrane

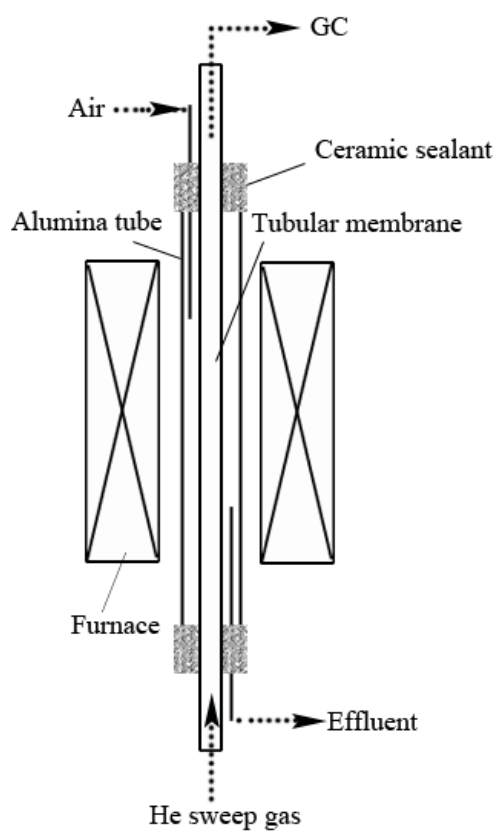

**Figure S2:** O<sub>2</sub>-TPD profiles of CGO-LBSFZ composites sintered at 1400 °C

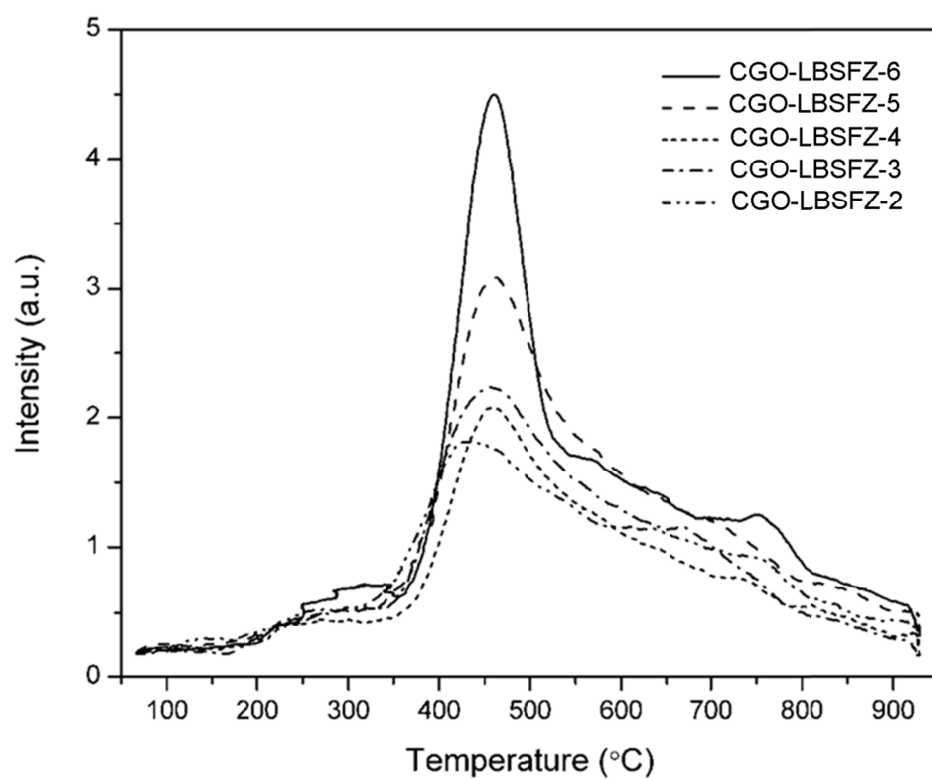

**Figure S3:** Oxygen permeation fluxes of CGO-LBSFZ membranes as a function of temperature.

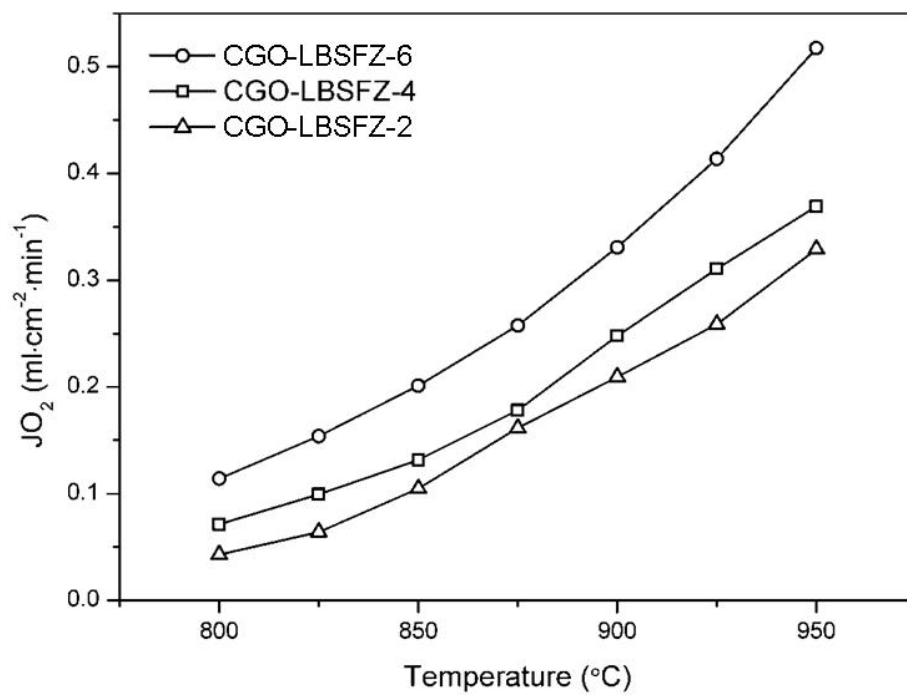

**Figure S4:** POM reaction of CGO-LBSFZ-6 membrane at 950 °C with 50% CH<sub>4</sub>-He feed gas.

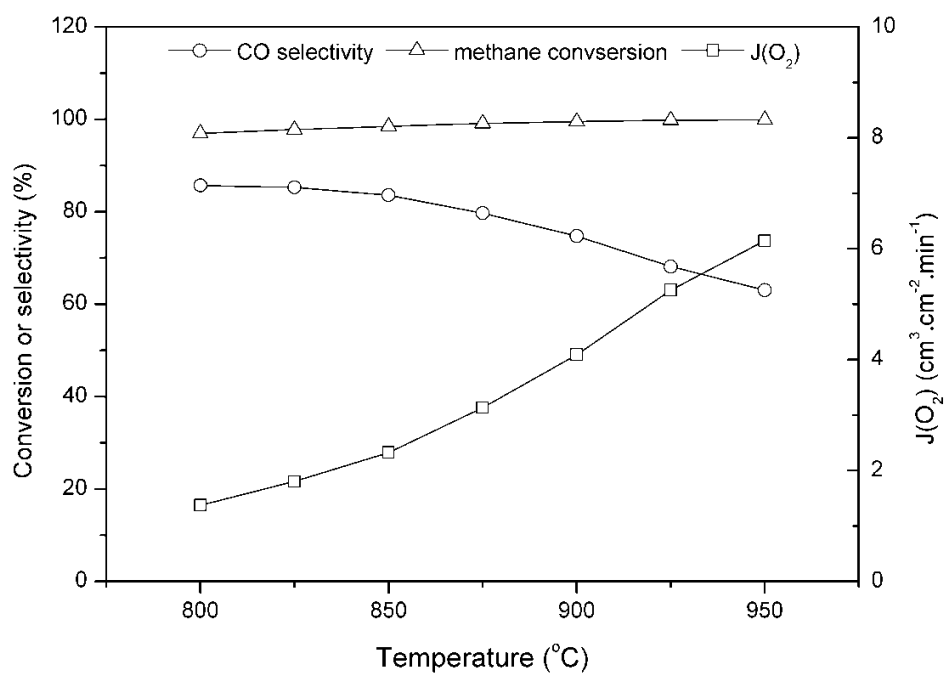

Supplement: c3ra45988h.pdf [file c3ra45988h.pdf]
